# Supplementary figures and images for: Optogenetic inhibition-mediated activity-dependent modification of CA1 pyramidal-interneuron connections during behavior
Source: eLife journal article supplement (doi:10.7554/elife.61106), 2020-10-05

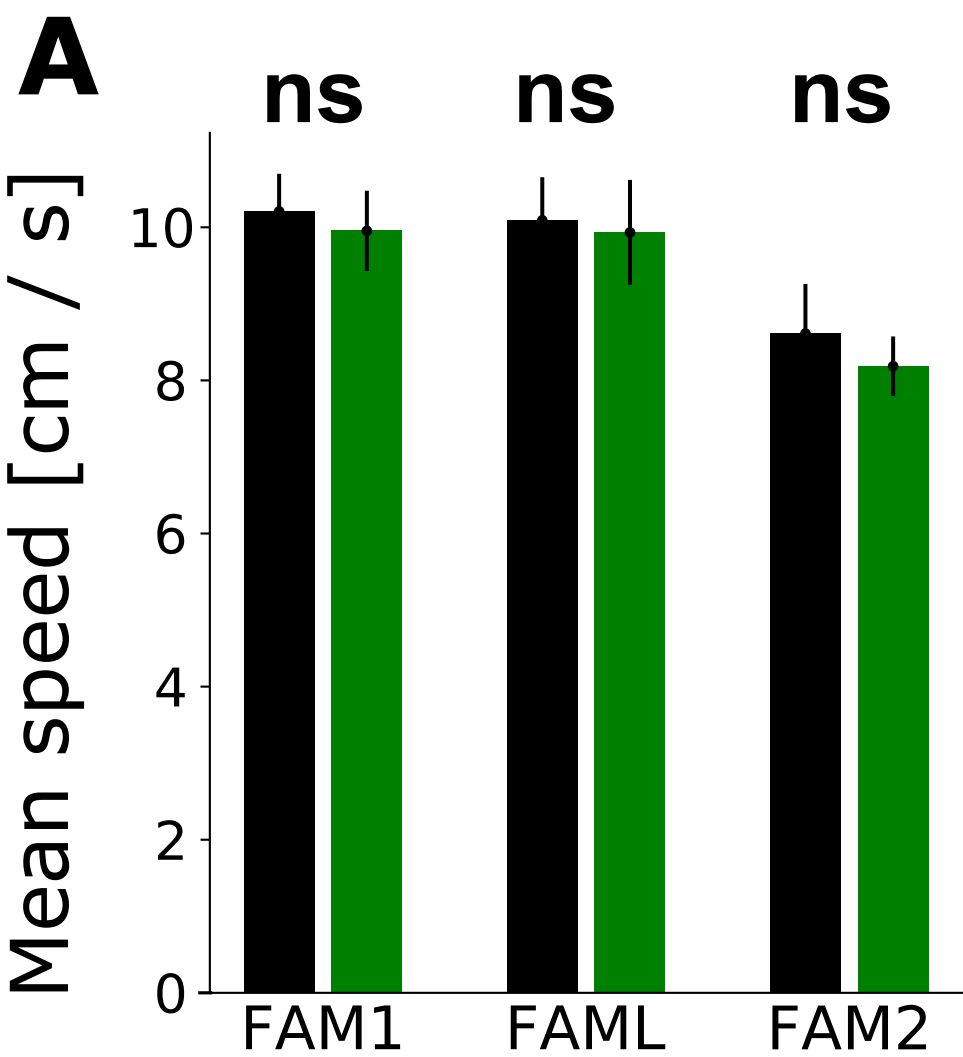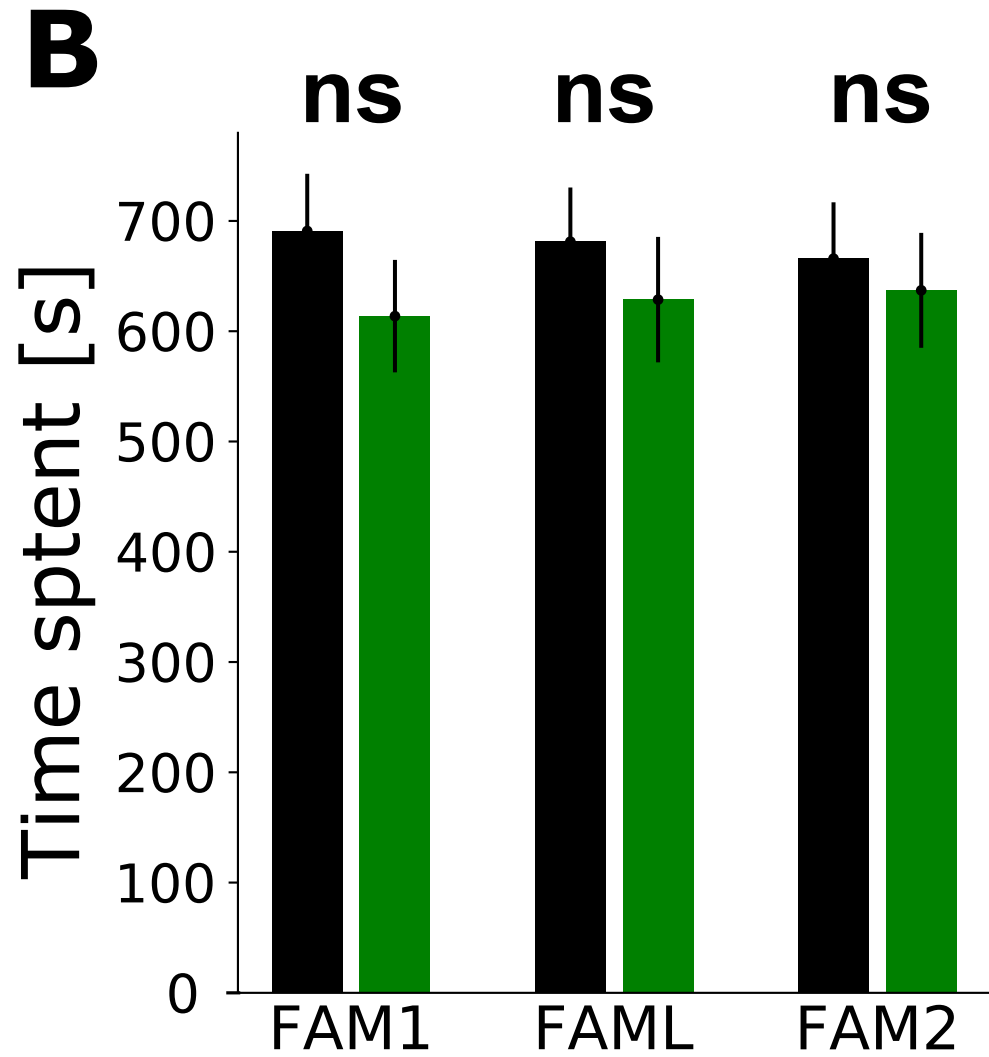

Supplement: supp [file elife-61106-supp-v1.zip]
